# Supplementary material for: Information theoretical quantification of cooperativity in signalling complexes
Source: Springer Nature journal article supplement (doi:10.1186/1752-0509-3-9), 2009-01-16

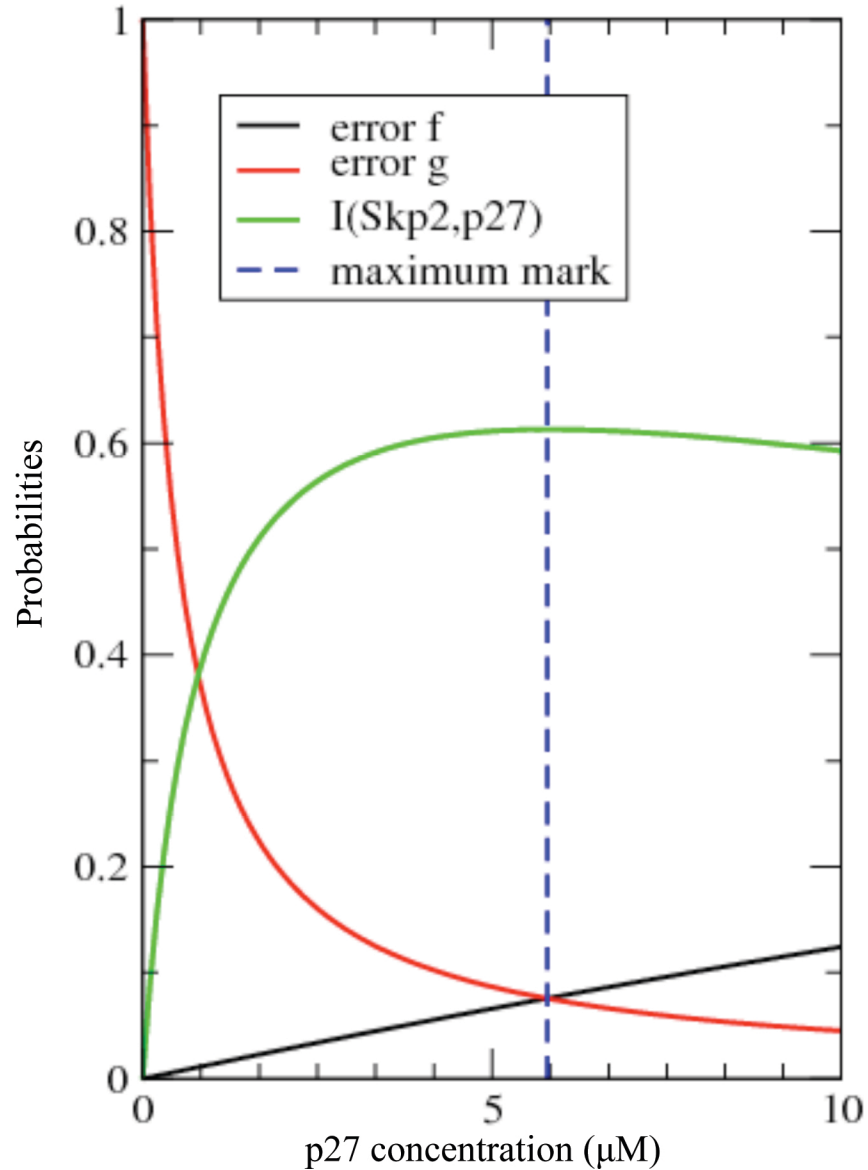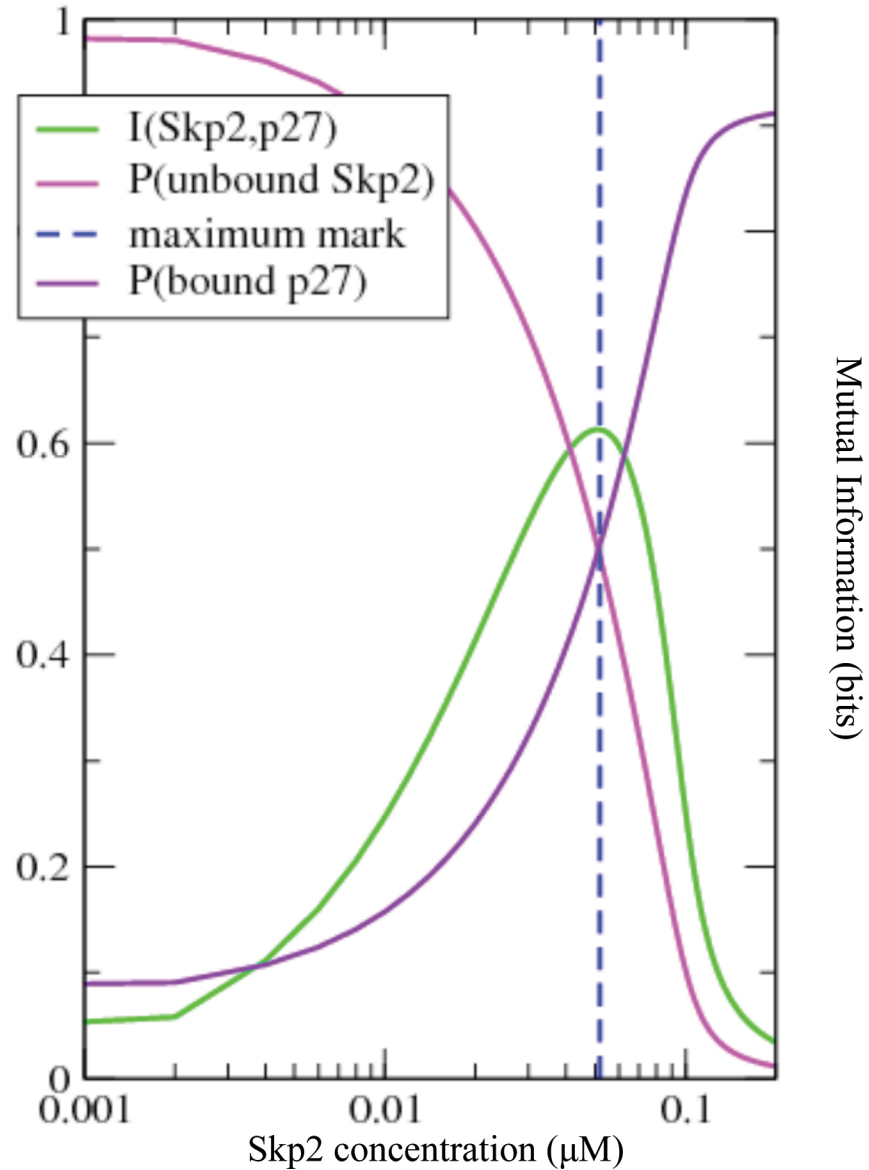

Supplement: 12918_2008_277_MOESM3_ESM.pdf [file 12918_2008_277_MOESM3_ESM.pdf]
